# Supplementary material for: The Experience of people with rheumatoid arthritis living with fatigue: a qualitative metasynthesis
Source: PubMed Central journal article supplement — BMJ Open. 2019 Mar 20;9(3):e024338. doi: 10.1136/bmjopen-2018-024338 (PMC6475175; doi:10.1136/bmjopen-2018-024338), 2019-03-20
Supplement: bmjopen-2018-024338supp001.pdf [file bmjopen-2018-024338supp001.pdf]

Supplementary file 1: Description of the literature search with the search terms

|                |                                               |                                                                                                                                                                                                                                          |
|----------------|-----------------------------------------------|------------------------------------------------------------------------------------------------------------------------------------------------------------------------------------------------------------------------------------------|
| <b>BLOCK 1</b> | Subject headings in PubMed                    | arthritis, rheumatoid [MeSH]                                                                                                                                                                                                             |
|                | Subject headings in Embase                    | exp rheumatoid arthritis/                                                                                                                                                                                                                |
|                | Subject headings in Cinahl                    | MH arthritis, rheumatoid+                                                                                                                                                                                                                |
|                | Subject headings in PsycINFO                  | exp rheumatoid arthritis/                                                                                                                                                                                                                |
|                | Subject headings in SveMed                    | exp rheumatoid arthritis/                                                                                                                                                                                                                |
|                | No Subject headings in Web of Science         |                                                                                                                                                                                                                                          |
| <b>AND</b>     | Each subject heading <b>OR</b> these keywords | ((rheumatoid OR reumatoid OR rheumatic OR reumatic OR rheumat* OR reumat*) AND (arthrit* OR artrit* OR diseas* OR condition* OR nodule*)) mp.                                                                                            |
|                |                                               |                                                                                                                                                                                                                                          |
| <b>BLOCK 2</b> | Subject headings in PubMed                    | asthenia [MeSH] fatigue[MeSH]                                                                                                                                                                                                            |
|                | Subject headings in Embase                    | exp asthenia/ exp fatigue/ exp lassitude/                                                                                                                                                                                                |
|                | Subject headings in Cinahl                    | MH fatigue                                                                                                                                                                                                                               |
|                | Subject headings in PsycINFO                  | exp asthenia/ exp fatigue/                                                                                                                                                                                                               |
|                | Subject headings in SveMed                    | exp asthenia/ exp fatigue/ exp lassitude                                                                                                                                                                                                 |
|                | No use of subject headings in Web of Science  |                                                                                                                                                                                                                                          |
|                | Each subject heading <b>OR</b> these keywords | fatigue* or tired* or sleepy or sleepi* or drows* or lassitude or letharg* or weary or weariness or exhaustion or exhausted or lacklustre or ((asthenia or asthenic) and syndrome) or ((lack or loss or lost) and (energy or vigour))mp. |
